# Supplementary material for: Self-assembly of conducting cocrystals via iodine⋯π(Cp) interactions
Source: Royal Society of Chemistry journal article supplement (doi:10.1039/c7ce00857k), 2017-01-01
Supplement: c7ce00857k1.pdf [file c7ce00857k1.pdf]

Online supplementary

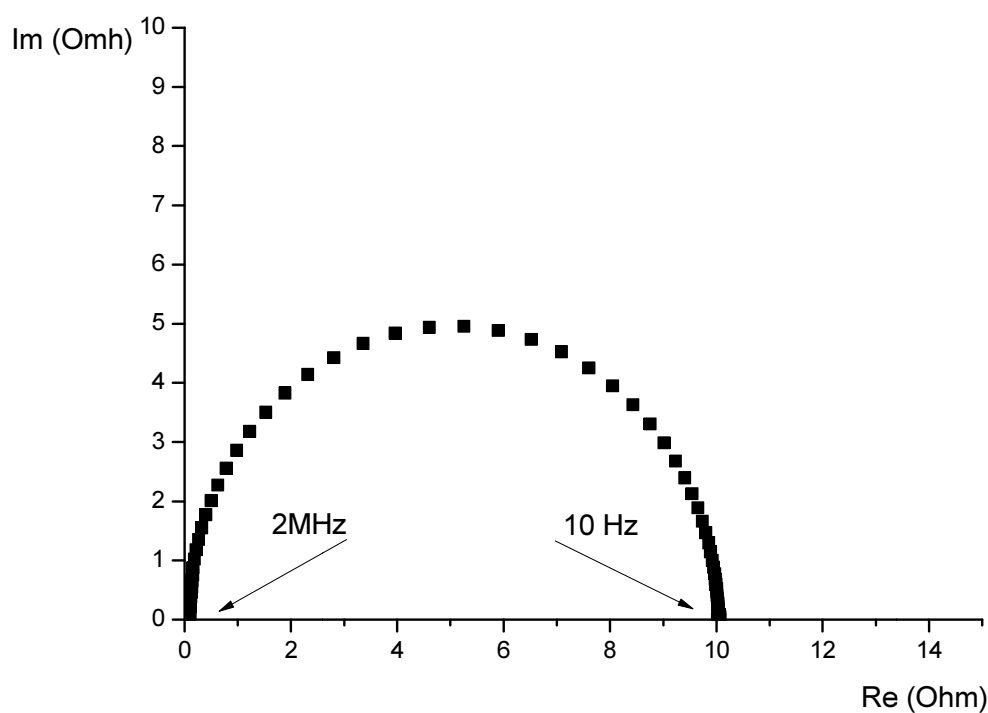

**Figure 1s.** The impedance spectrum of  $\text{Cp}_2\text{Fe}\dots\text{C}_2\text{I}_2$  specimenes. Semi-circle shape of a curve signify the e-type conductivity.

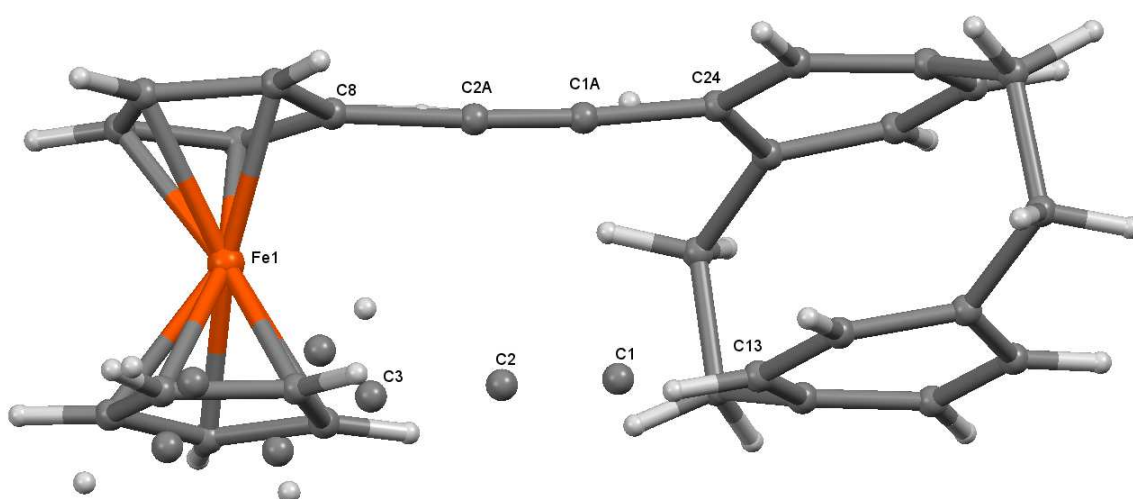

**Figure 2s.** Molecular structure of 1-paracyclophane-2-ferrocenylacetylene (**6**) showing disorder in the positions of Cp ring and triple C-C bond.
